# Supplementary material for: Application of a functionalized mesoporous silica catalyst to the synthesis of tetrazoles
Source: Royal Society of Chemistry journal article supplement (doi:10.1039/c5nj00211g), 2015-01-01
Supplement: c5nj00211g1.pdf [file c5nj00211g1.pdf]

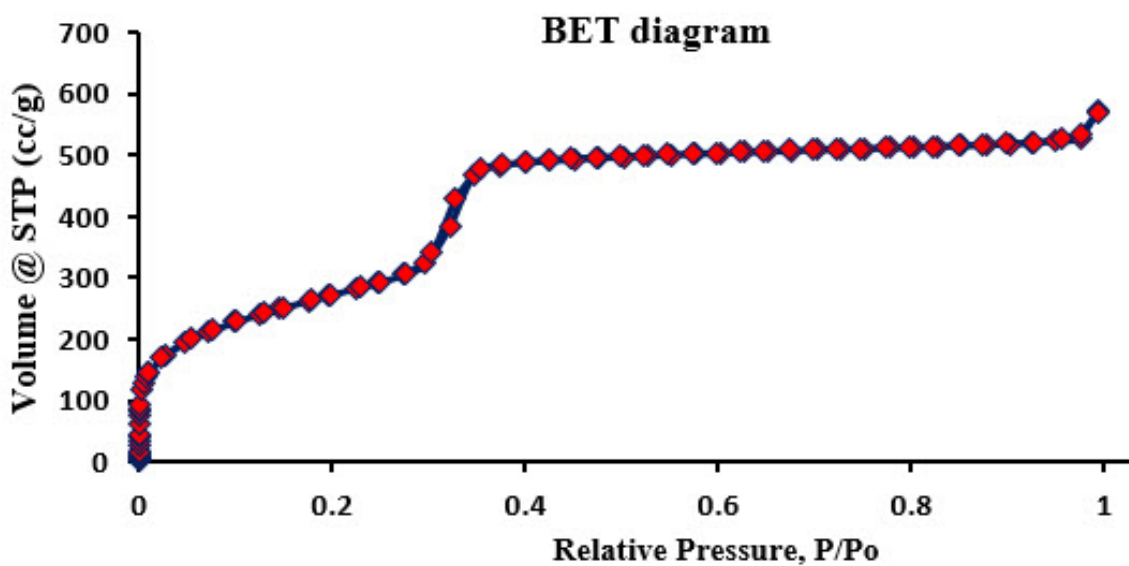

Fig S1. The N<sub>2</sub>-sorption isotherm of MCM-41 at 77 K

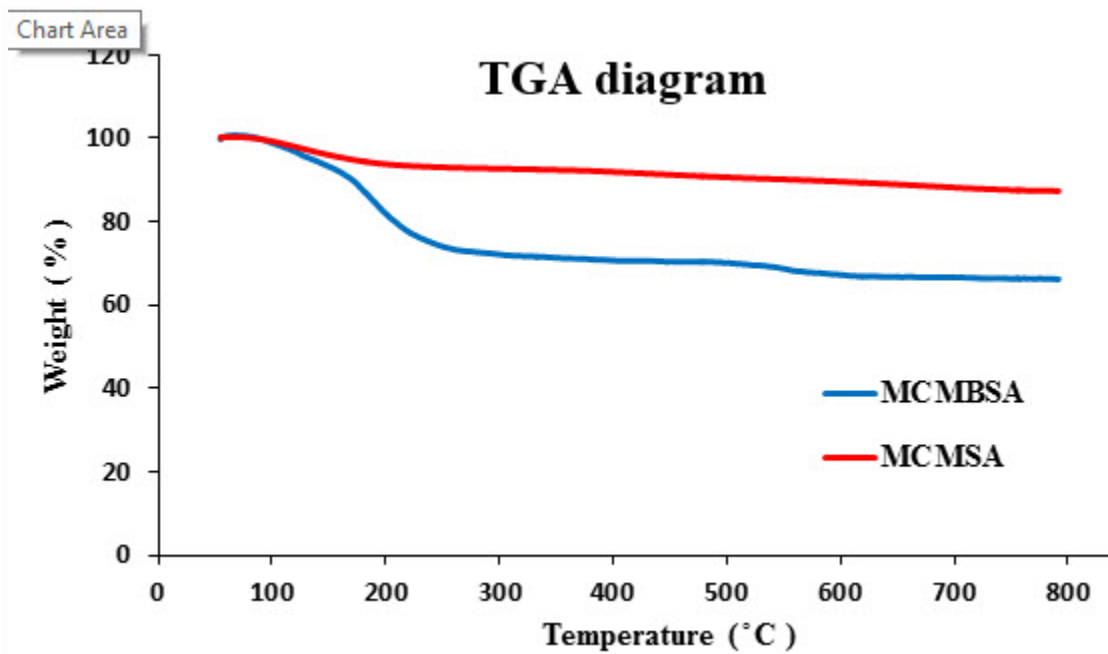

Fig. S2. The TG-profile of MCMBSA and MCMSA catalysts

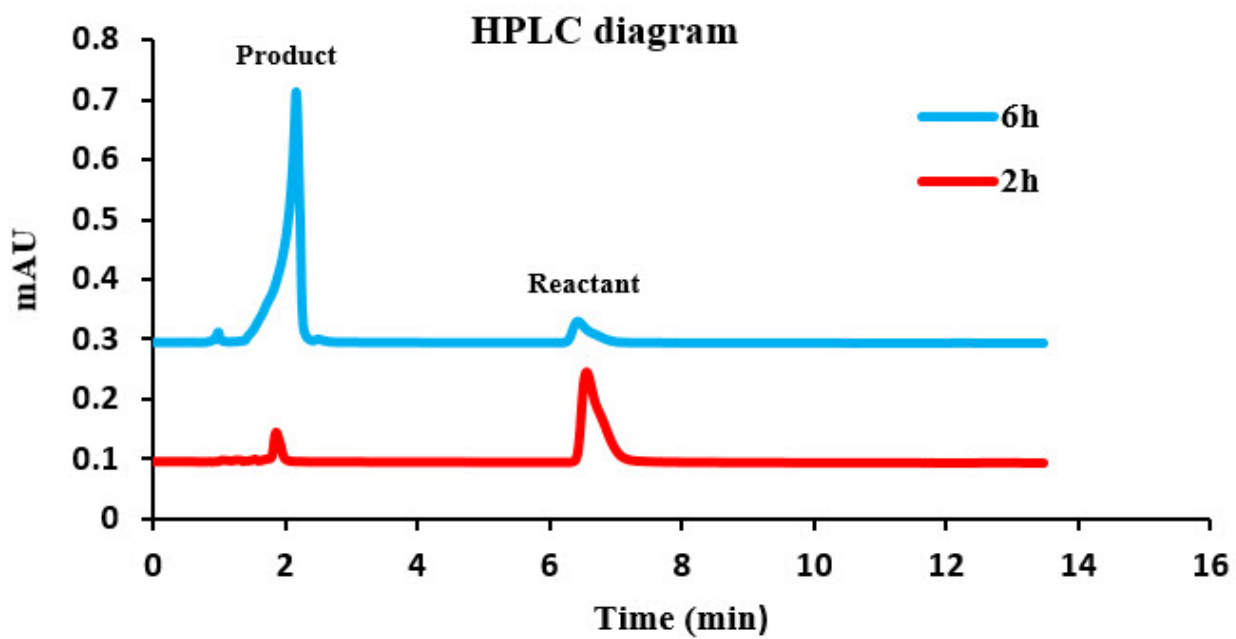

Figure S3. HPLC chromatogram of reaction benzonitril and sodium azide at diffrents times.

**Table S1**Preparation of tetrazole derivatives under optimized condition using **MCMBSA** catalyst

| Reactant                                                                            | Product                                                                             | Time (h) | Yield % |
|-------------------------------------------------------------------------------------|-------------------------------------------------------------------------------------|----------|---------|
| 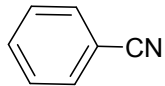   |    | 10       | 83      |
|    |    | 12       | 82      |
|    |    | 12       | 70      |
|    |    | 14       | 70      |
|   |   | 16       | 65      |
|  |  | 20       | 75      |
|  |  | 12       | 83      |
|  |  | 14       | 85      |
|  |  | 14       | 75      |
|  |  | 12       | 75      |
